# Supplementary material for: Image-based detection of oligonucleotides – a low cost alternative to spectrophotometric or fluorometric methods
Source: Royal Society of Chemistry journal article supplement (doi:10.1039/c3an02402d), 2014-01-01
Supplement: c3an02402d1.pdf [file c3an02402d1.pdf]

## Supporting Information

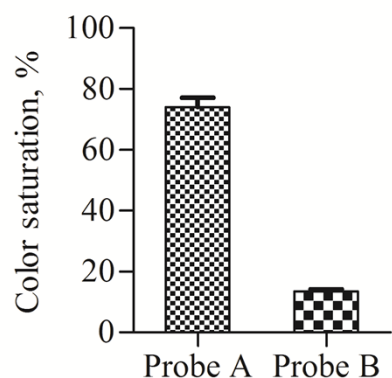

**Fig. S.1:** Covalent coupling of oligonucleotides to APP $\mu$ TP through end labelled  $-\text{NH}_2$  moiety. Amino modified Probe A showed excellent immobilization whereas probe B (no amino labelling) fails to bind the activated surface; showing that it's the end labelled amine group that participates in covalent coupling and not the amine groups of bases.

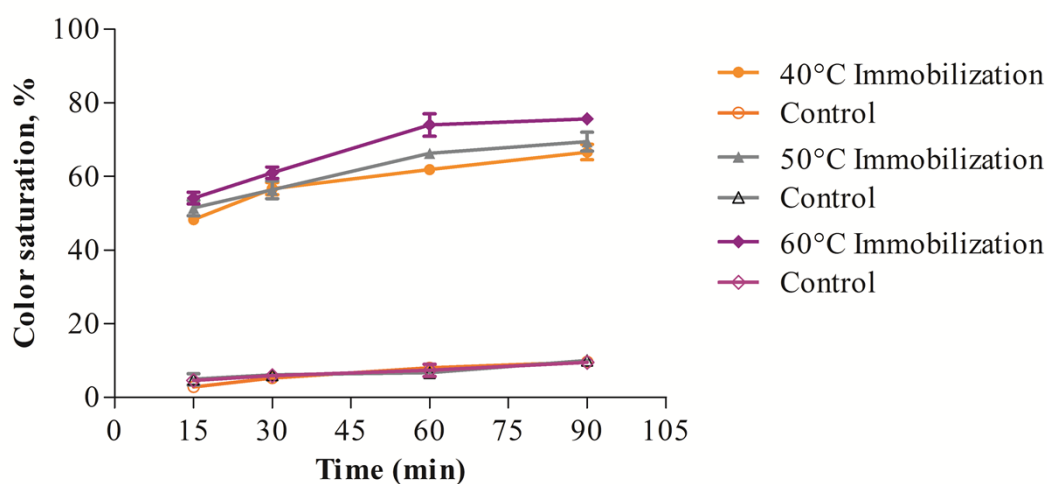

**Fig.S2.** Effect of incubation time and temperature for oligonucleotide immobilization on APP $\mu$ TP. In all sets of experiments, 100 nM of probe A was used, while the control experiments were performed using same concentration of unlabelled probe B.

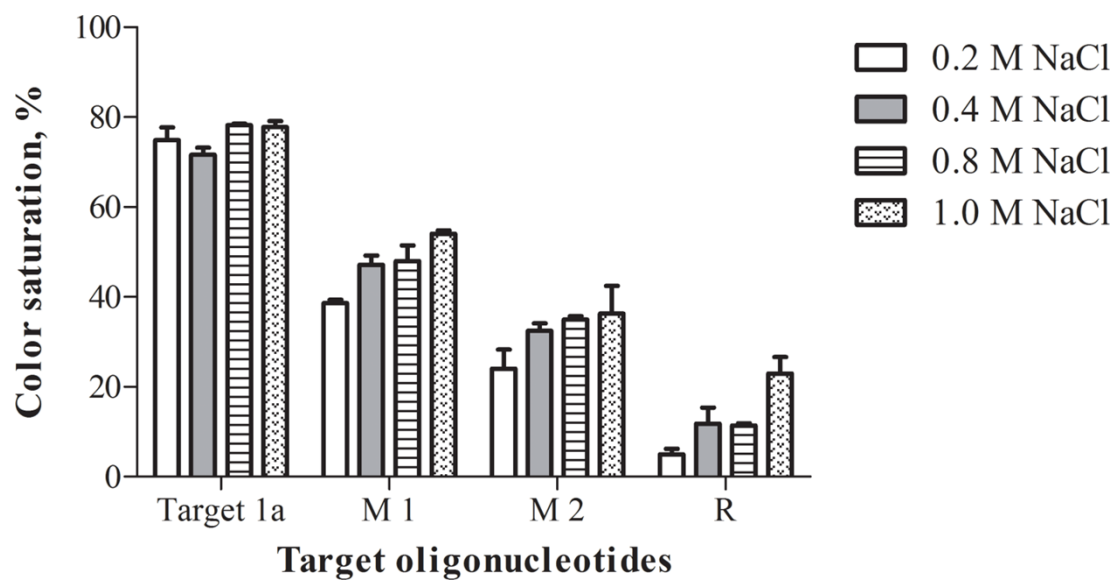

**Fig.S3.** Effect of salt concentration on oligonucleotide hybridization. Equimolar concentration (100 nM) of probe 1 was immobilized to APP $\mu$ TP followed by hybridization with 100 nM of target 1a, mismatch 1, mismatch 2 and random sequence respectively. Colour is quantified by colour saturation.
